# Supplementary material for: Is the Combination of Robot-Assisted Therapy and Transcranial Direct Current Stimulation Useful for Upper Limb Motor Recovery? A Systematic Review with Meta-Analysis
Source: MDPI journal article supplement (doi:10.3390/healthcare12030337), 2024-01-29
Supplement: s1 [file s1]

## *Supplementary Material*

### **Supplementary Table S1. Search strategy.**

Search keywords were based on the population (stroke) and constructs of interests (tDCS combined with robotic-assisted intervention); these included:

(tDCS OR transcranial direct current stimulation OR a-tDCS OR c-tDCS OR brain stimulation OR brain stimulation techniques OR non-invasive brain stimulation)

AND

(robot\* OR robotics OR robot assisted\* OR robotic treatment OR robotic rehabilitation OR rehabilitation robot OR robot-assisted therapy\* OR robot-based therapy OR Amadeo OR end effector OR end-effector OR exoskeleton OR exoskeleton device OR robotic exoskeleton)

AND

(stroke\* OR hemiplegia OR hemiparesis OR cerebral vascular accident\* OR cerebral vascular disorder OR CVA OR brain ischaemia OR brain infarction OR lacunar stroke OR brain injury OR pot-stroke)

AND

(upper limb OR upper extremity OR arm OR arm training OR wrist OR finger OR elbow OR shoulder)

**Supplementary Table S2. Inclusion criteria.**

**Design**

- Randomized clinical trials or crossover designs

**Participants**

- Adult age, > 18 years old
- People with subacute or chronic stroke
- No epilepsies or epileptic syndromes

**Intervention**

- Transcranial direct current stimulation (tDCS) combined with robot-assisted therapy (RAT) for upper limb

**Outcome measures**

- Primary: Deficit severity
- Secondary: Hand dexterity and spasticity

**Comparison**

- Real-tDCS combined with RAT for upper limb *versus* no/sham-tDCS intervention

**Supplementary Table S3. Category data extraction.**

| <b>Category</b>        | <b>Data extraction</b>                                                                                 |
|------------------------|--------------------------------------------------------------------------------------------------------|
| Methodology            | Randomized; blinded; patient loss; experimental and control group; inclusion and exclusion criteria.   |
| tDCS intervention      | Area stimulated; intensity; timing (online u offline); time application; characteristics; tDCS design. |
| Robot-Assisted Therapy | Robot device; number of repetitions; time application.                                                 |
| Outcomes               | Timing outcomes; basal outcome information; post outcomes information; first and secondary outcomes    |
| Patients               | Gender; allocated; n; hemispheric affected; area affected; age; time since stroke; stroke type.        |

**Supplementary Table S4. GRADE System application: Classification of quality of evidence and strength of recommendation of the included studies.**

| GRADE Evidence                                                     |                     |                    |                    |                    |
|--------------------------------------------------------------------|---------------------|--------------------|--------------------|--------------------|
|                                                                    | Deficit severity    | Hand dexterity     | Spasticity         | Activity           |
| <b>Test</b>                                                        | FMA UE              | BBT                | MAS                | BI                 |
| <b>Nº of studies</b>                                               | 8                   | 5                  | 5                  | 3                  |
| <b>Nº of comparisons</b>                                           | 9                   | 5                  | 5                  | 3                  |
| <b>Design</b>                                                      | RCT                 | RCT                | RCT                | RCT                |
| <b>Risk of bias</b>                                                | Not serious         | Not clear          | Not clear          | Not serious        |
| <b>Inconsistency (Heterogeneity)</b>                               | Low                 | Low                | Low                | Low                |
| <i>I<sup>2</sup></i>                                               | 0%                  | 0%                 | 0%                 | 2%                 |
| <b>Undirect evidence</b>                                           | No                  | No                 | No                 | No                 |
| <b>Imprecision</b>                                                 | No                  | No                 | No                 | No                 |
| <i>N Total</i>                                                     | 354                 | 133                | 200                | 162                |
| <i>Optimal information size (OIS) for Effect size=0.3 (medium)</i> | 82                  | 82                 | 82                 | 82                 |
| <b>Publication Bias</b>                                            | Not clear           | Not clear          | No                 | No                 |
| <b>Índice LFK</b>                                                  | -2.15               | 2.62               | 1.11               | 0.52               |
| <b>P Value Test of Begg</b>                                        | 0.71                | 0.46               | 0.8                | 1                  |
| <b>P Value Test of Egger</b>                                       | 0,36                | 0.18               | 0.59               | 0.7                |
| <b>Effect size: SMD (95%CI)</b>                                    | -0.09 [-0.31, 0.12] | 0.12 [-0.22, 0.46] | 0.04 [-0.24, 0.32] | 0.66 [-1.82, 3.14] |
| <b>Large effect size (SMD&gt;0.8)</b>                              | No                  | No                 | No                 | No                 |
| <b>Dose-response effect</b>                                        | Not applicable      | Not applicable     | Not applicable     | Not applicable     |
| <b>Control for confounding factors</b>                             | High                | High               | High               | High               |
| <b>GRADE evidence level</b>                                        | High                | High               | High               | High               |

(- Level) = Down level evidence; (+ Level) = Up level evidence; SMD = Standardized mean difference.

FM-UE = Fugl-Meyer Assessment Upper Extremity; MAS = Modified Ashworth Scale; BBT = Box and Block Test; BI = Barthel Index.

Supplementary Table S5. PEDro criteria and scores for the included trials (n = 9).

| Study                    | Random allocation | Concealed allocation | Groups similar at baseline | Participant blinding | Therapist blinding | Assessor blinding | < 15% dropouts | Intention to-treat analysis | Between-group difference reported | Point estimate and variability reported | Total (0 to 10) |
|--------------------------|-------------------|----------------------|----------------------------|----------------------|--------------------|-------------------|----------------|-----------------------------|-----------------------------------|-----------------------------------------|-----------------|
| (Hesse et al., 2011)     | Y                 | Y                    | Y                          | Y                    | N                  | Y                 | Y              | N                           | Y                                 | Y                                       | 8               |
| (Morone et al., 2022)    | Y                 | Y                    | Y                          | Y                    | Y                  | Y                 | Y              | N                           | Y                                 | Y                                       | 9               |
| (Triccas et al., 2015)   | Y                 | Y                    | Y                          | Y                    | N                  | Y                 | Y              | N                           | Y                                 | Y                                       | 8               |
| (Straudi et al., 2016)   | Y                 | Y                    | Y                          | Y                    | N                  | Y                 | Y              | N                           | Y                                 | Y                                       | 8               |
| (Dehem et al., 2018)     | Y                 | Y                    | Y                          | Y                    | Y                  | Y                 | Y              | N                           | Y                                 | Y                                       | 9               |
| (Edwards et al., 2019)   | Y                 | Y                    | Y                          | Y                    | N                  | Y                 | Y              | N                           | Y                                 | Y                                       | 8               |
| (Mazzoleni et al., 2015) | Y                 | Y                    | Y                          | Y                    | N                  | Y                 | Y              | N                           | Y                                 | Y                                       | 8               |
| (Mazzoleni et al., 2017) | Y                 | Y                    | Y                          | Y                    | N                  | Y                 | Y              | N                           | Y                                 | Y                                       | 8               |
| (Mazzoleni et al., 2019) | Y                 | Y                    | Y                          | Y                    | N                  | Y                 | Y              | N                           | Y                                 | Y                                       | 8               |

N = No; Y = Yes.

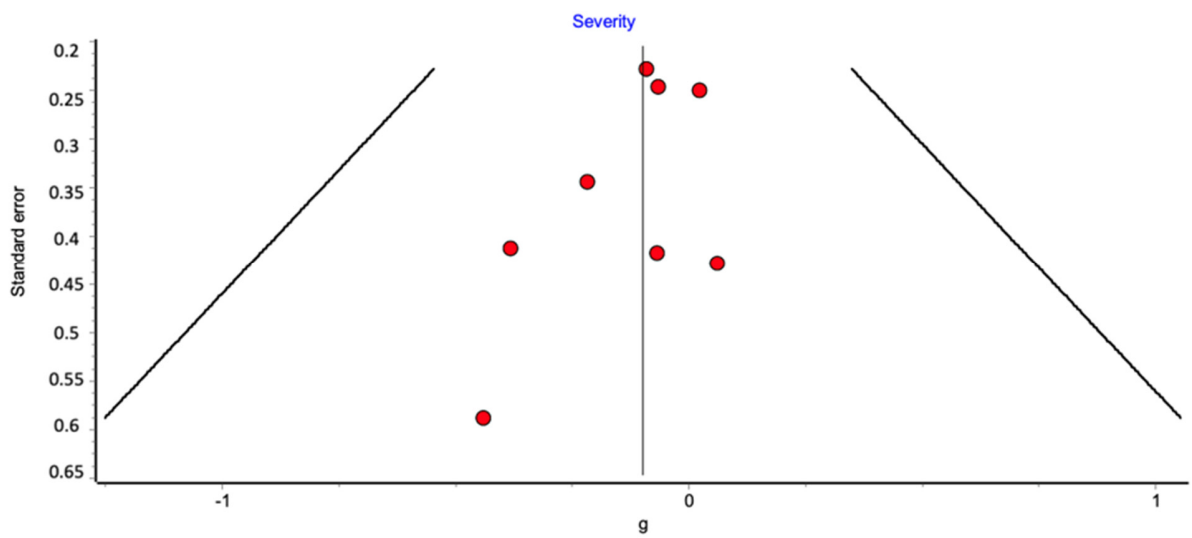

Funnel plot-Deficit Severity

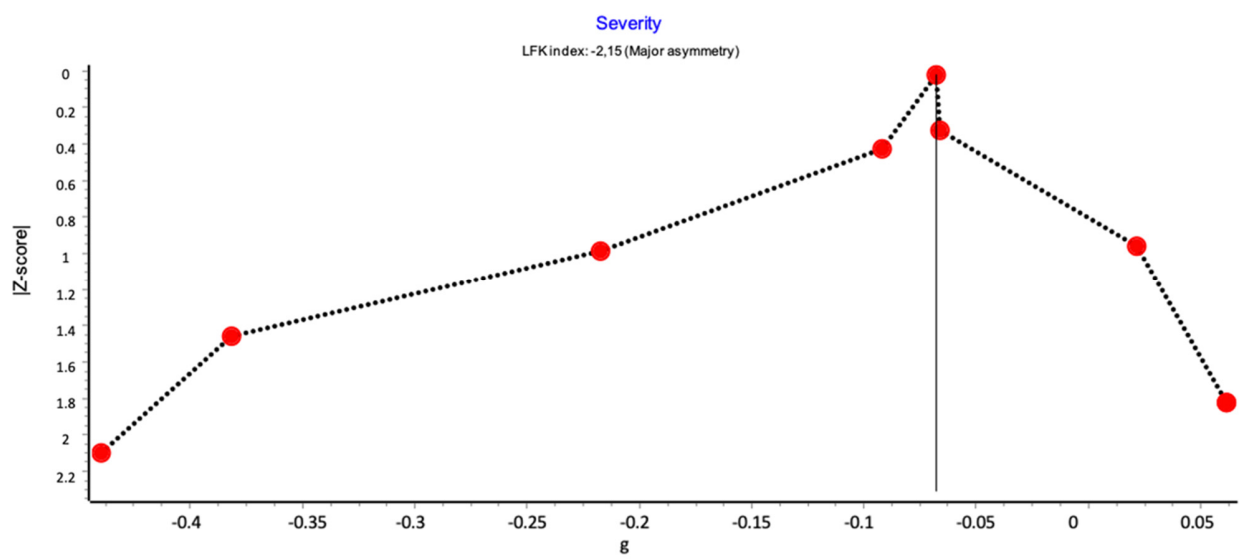

DOI plot-Deficit Severity

(B) Hand dexterity.

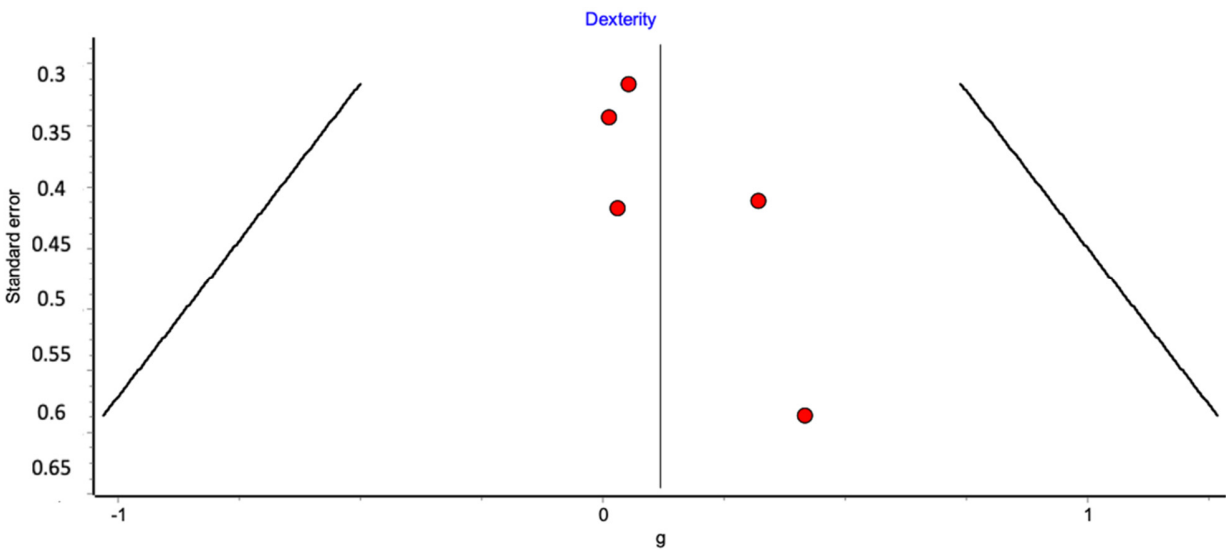

Funnel plot-Hand dexterity

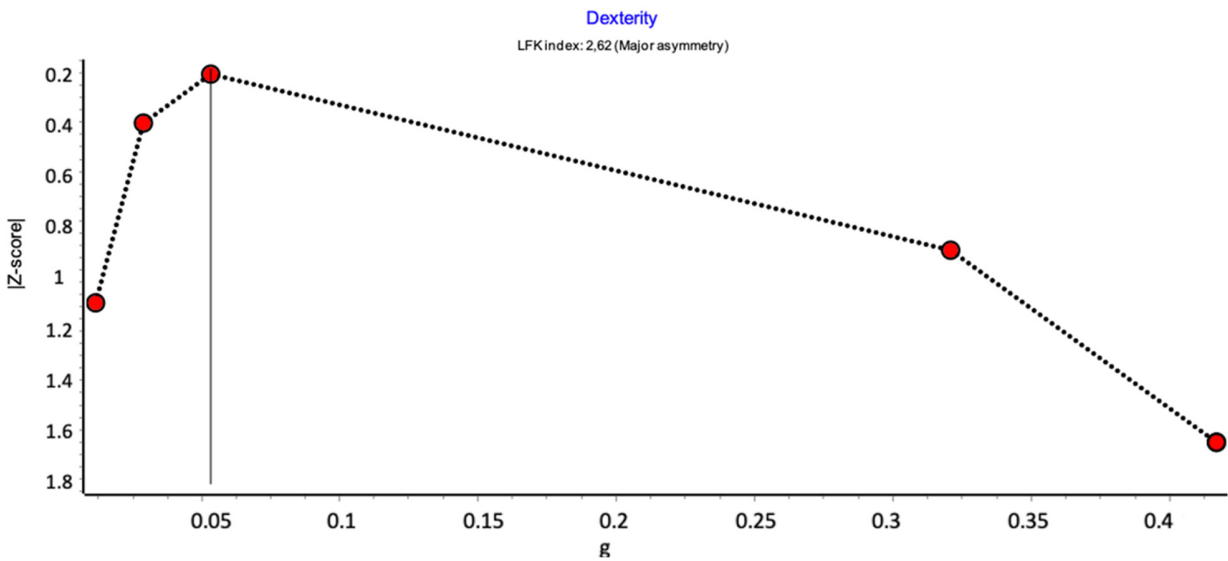

DOI plot-Hand dexterity

(C) Spasticity.

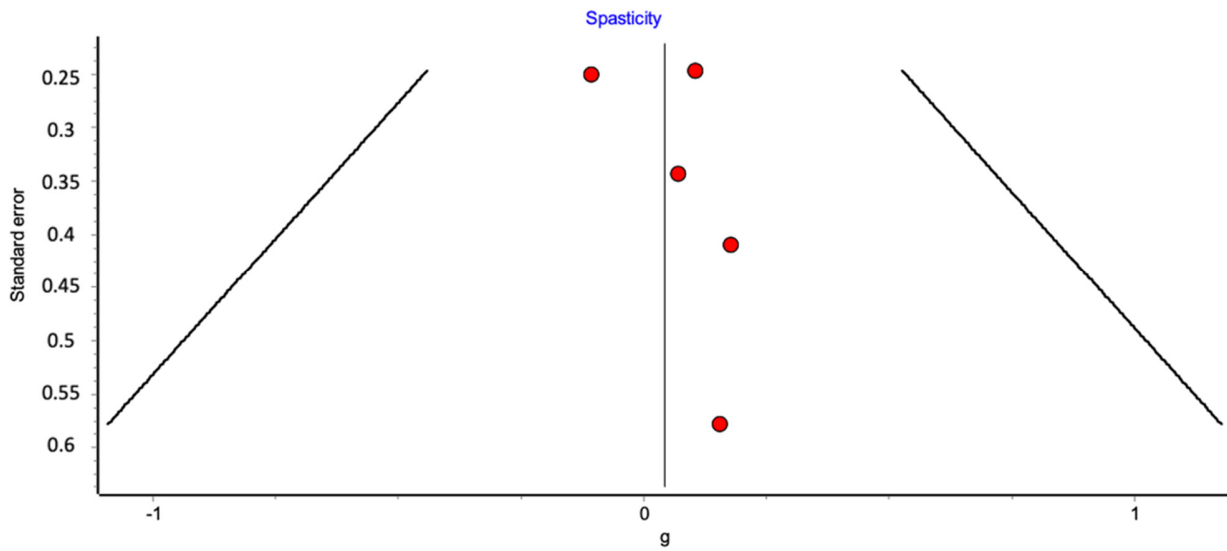

Funnel plot-Spasticity

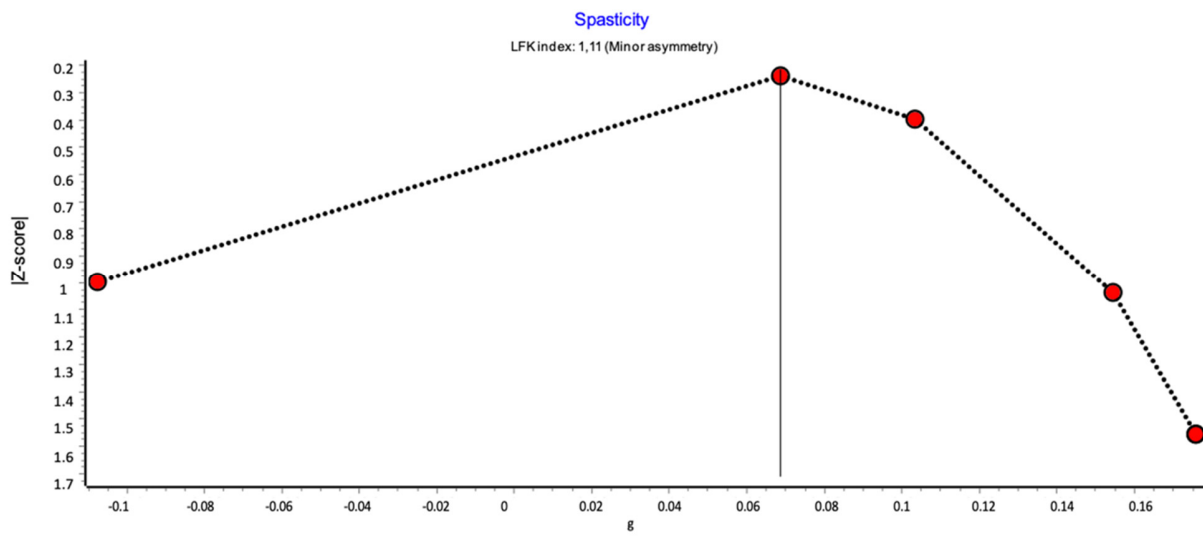

DOI plot-Spasticity



(D) Activity.

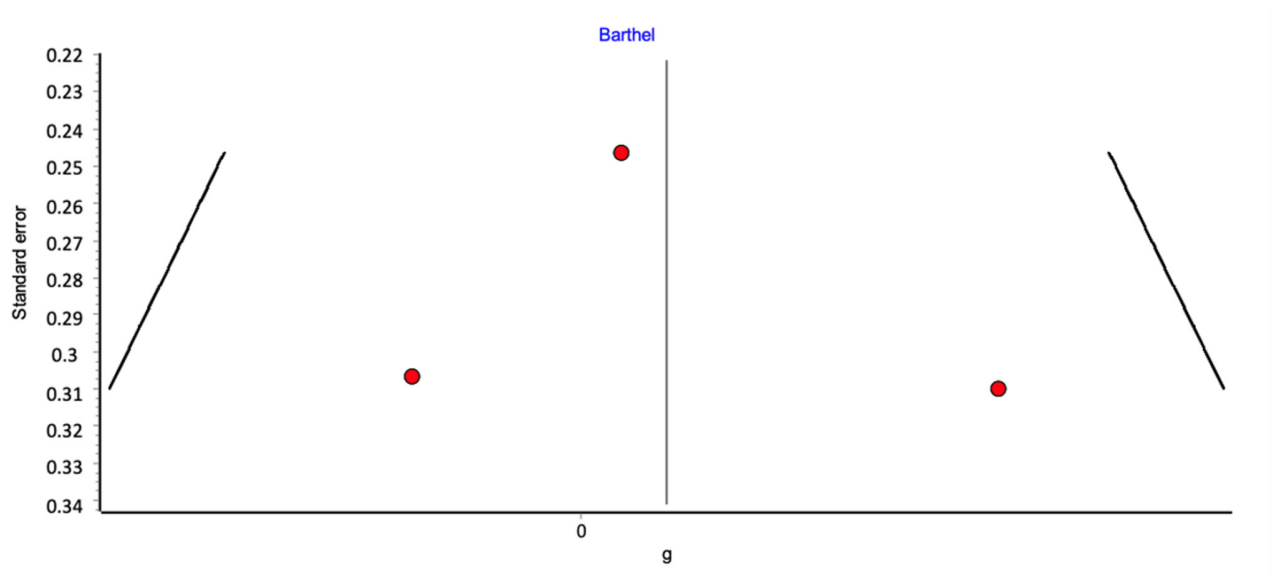

Funnel plot-Activity

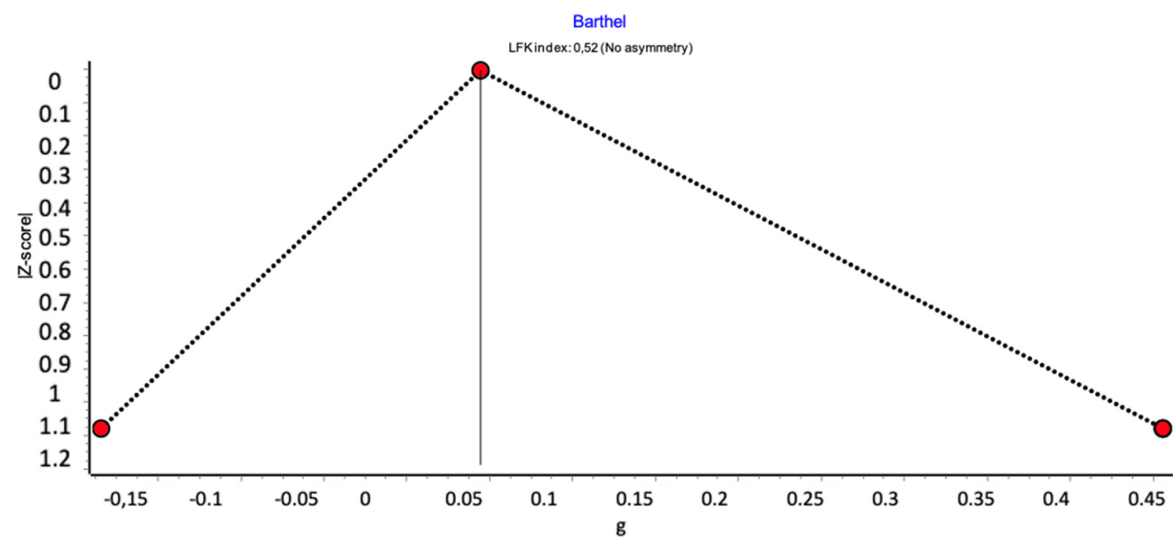

DOI plot-Activity

Supplementary Figure S1: (A) Deficit Severity.
